# Supplementary material for: CsCuAOs and CsAMADH1 Are Required for Putrescine-Derived γ-Aminobutyric Acid Accumulation in Tea
Source: MDPI journal article supplement (doi:10.3390/foods11091356), 2022-05-06
Supplement: s1 [file s1]

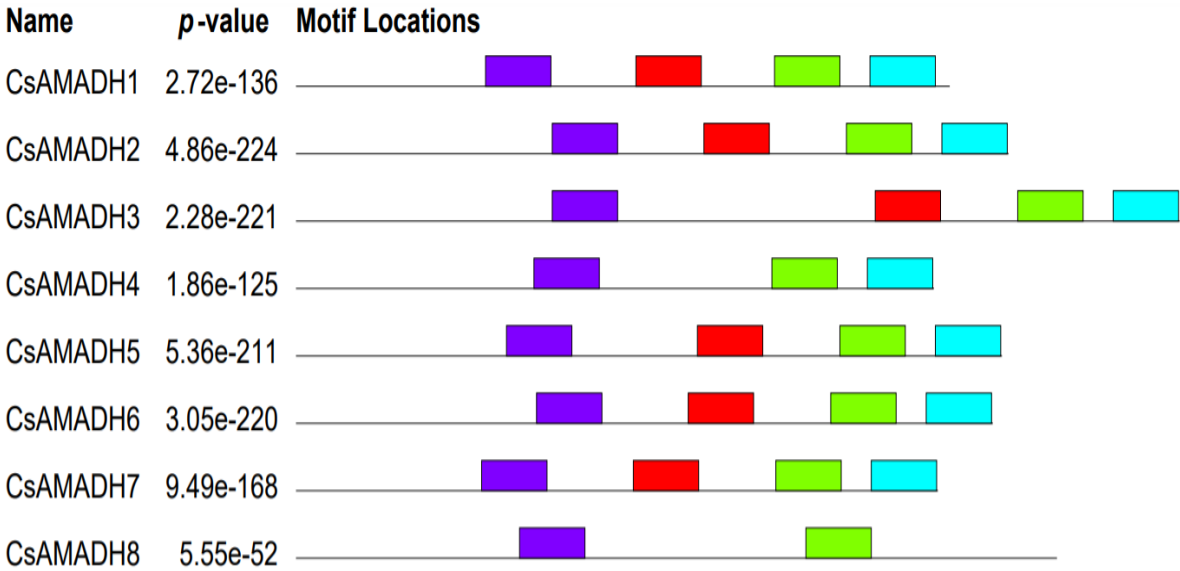

| Motif | Symbol | Motif Consensus                                     |
|-------|--------|-----------------------------------------------------|
| 1.    |        | LGGKSPFIVCEDADVDKAVELAHFALFFNQGCCAGSRTFVHERIYDEF    |
| 2.    |        | VWINCDFVFDAAIPFGGYKMSGFGREKGIYSLBNYLQVKAVVTPJKNPAW  |
| 3.    |        | GYIYZPTIFSBBQDBMLIAKDEIFGPVQSILKFKDIDEVIKRNATRYGL   |
| 4.    |        | QTLHEPIGVVGQIIPWNFPLLMFAWKVGPALAAAGNTIVLKTAEQTPLTAL |

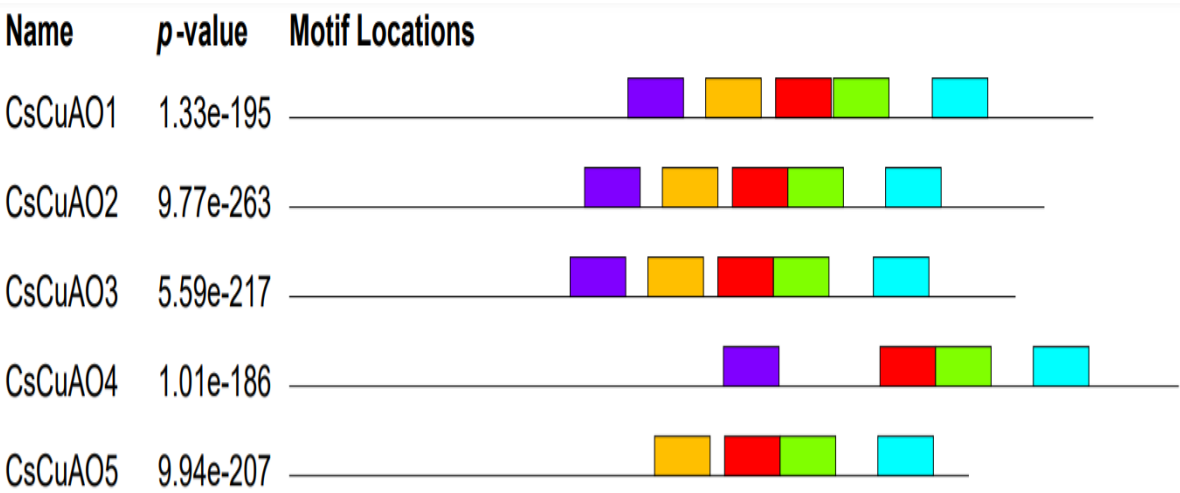

| Motif | Symbol | Motif Consensus                                    |
|-------|--------|----------------------------------------------------|
| 1.    |        | RPEVSLVVRMVSTVGNYDYIIDWEFKPSGSIKVGVLGTGILEVKGVSYTH |
| 2.    |        | VNPNKKTCLGNPVGRLIPGSTVTSLLSKDDYPQIRGAFTNYNVWVTPYN  |
| 3.    |        | TDQIKEDVYGTLLADNTIGVYHDHFLTYHLDLDVDGEANSFVRSKLETRR |
| 4.    |        | RWANWEFHLGFDVRAGPIISLASIYDLGKKEYRRVLYRGFVSELFVPYMD |
| 5.    |        | SAVSLEPLKDCPANAVYMDGYAGQDGKPKVISNVFCIFERYAGDVLWRH  |

Figure S1

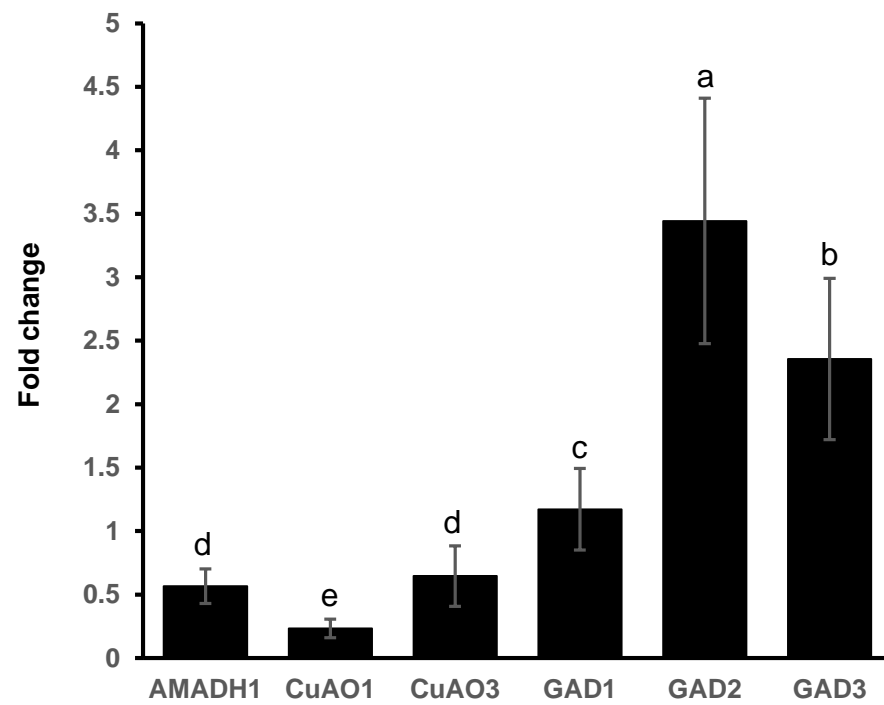

**Figure S2**
